# Supplementary material
Source: PubMed Central journal article supplement (PMC4383100)
Supplement: NIHMS671794-supplement-supplement_1.pdf [file NIHMS671794-supplement-supplement_1.pdf]

## Supplementary Information:

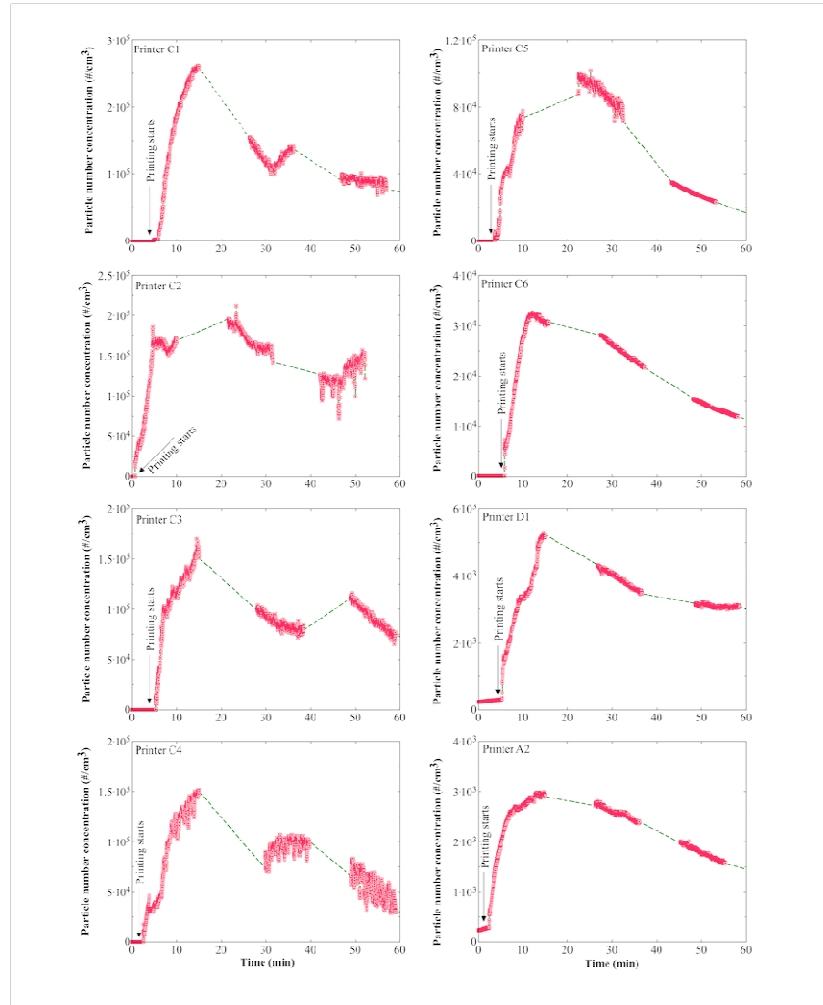

Figure S1. Particle number concentration of the remaining eight tested laser printers during a 60-minute print job using a 5% page coverage. Data obtained from CPC instrument.

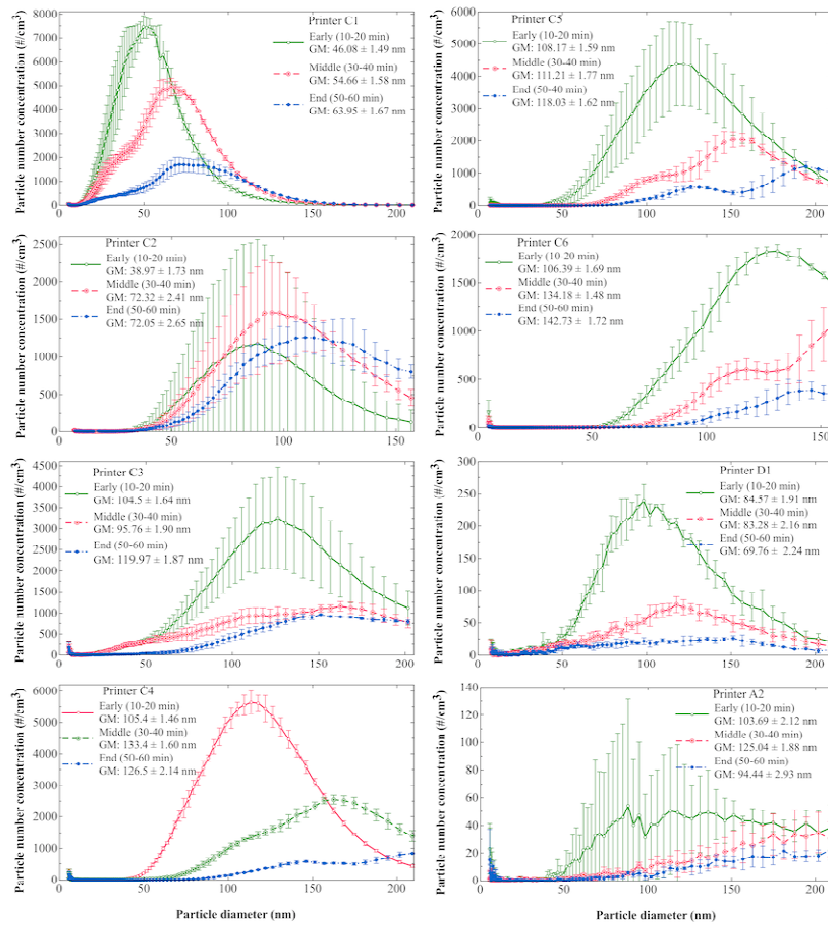

Figure S2. Average PEP size distribution generated by the remaining laser printers at different time points of a 60-minute print job using a 5% page coverage. Graph data shows the geometric standard mean (GM)  $\pm$  geometric standard deviation at different print job time points.

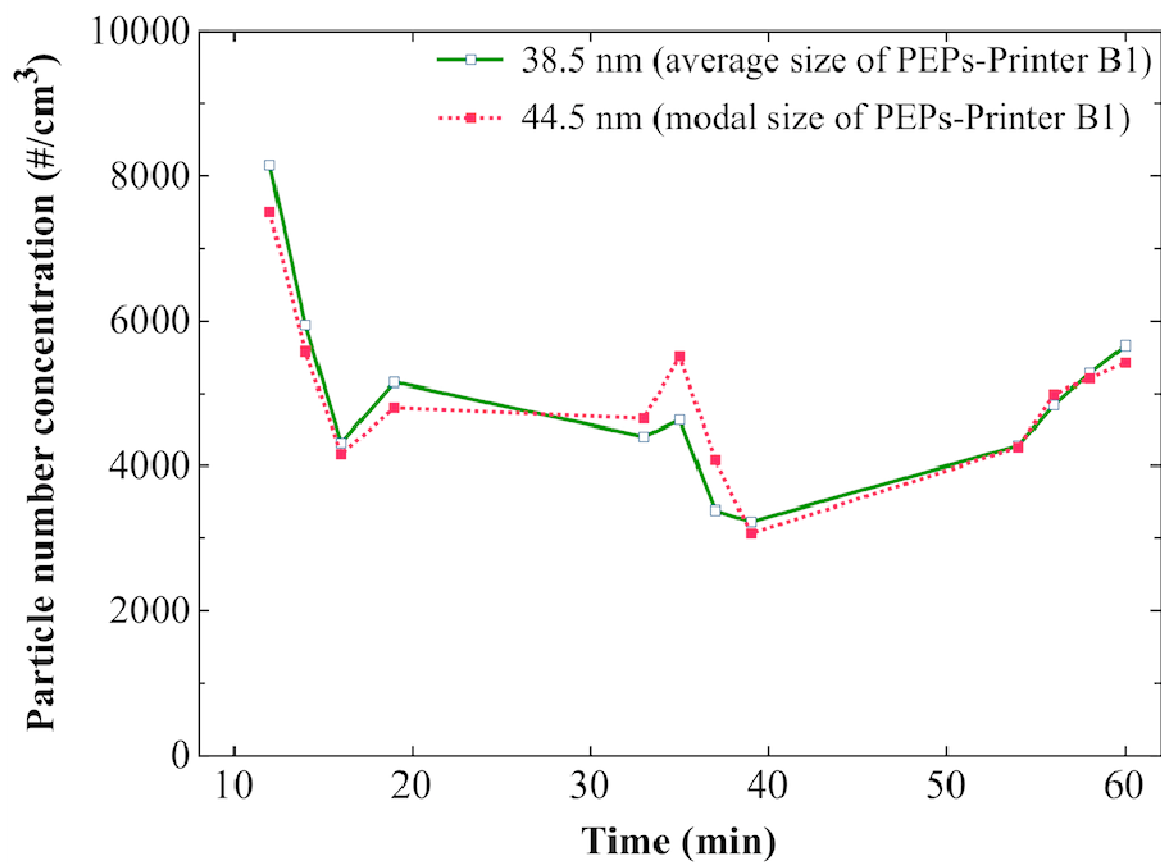

Figure S3. Snapshot of number concentration of particles emitted by printer B1, for two particle diameters, as a function of time.

**Table S1.** Functional properties of all the eleven evaluated laser printers.

| Printer | Printing speed (pages/min) | Color or halftone | Manufacture year |
|---------|----------------------------|-------------------|------------------|
| A1      | 31                         | Color             | 2011             |
| A2      | 38                         | Halftone          | 2013             |
| B1      | 24                         | Halftone          | 2012             |
| B2      | 21                         | Halftone          | 2004             |
| C1      | 12                         | Halftone          | 2007             |
| C2      | 35                         | Halftone          | 2009             |
| C3      | 30                         | Color             | 2009             |
| C4      | 33                         | Halftone          | 2012             |
| C5      | 27                         | Halftone          | 2007             |
| C6      | 25                         | Halftone          | 2011             |
| D1      | 26                         | Halftone          | 2012             |

---

**Table S2.** Summary of parameters used in the *in vivo* lung Multiple Path Particle Deposition model (MPPD2, Anjilvel and Asgharian 1995).

| Human Model                                  | Breathing Parameters                                               | <i>Airborne Nanoparticle Distribution</i>             |
|----------------------------------------------|--------------------------------------------------------------------|-------------------------------------------------------|
| <i>Functional Residual Capacity:</i> 3300 mL | <i>Tidal Volume:</i><br>625 ml                                     | <i>CMD:</i><br>57.45 nm                               |
| <i>Head Volume:</i><br>50 mL                 | <i>Breathing Frequency:</i><br>12 breaths/ min                     | <i>Geometric Standard Deviation:</i><br>1.67          |
| <i>Breathing Route:</i><br>Nasal             | <i>Inspiratory Fraction:</i> 0.5<br><br><i>Pause Fraction:</i> 0.0 | <i>Mass Concentration:</i><br>23.86 µg/m <sup>3</sup> |
